# Supplementary material for: Genomic Variability of Canine Parvoviruses from a Selected Population of Dogs and Cats in Sri Lanka
Source: MDPI journal article supplement (doi:10.3390/pathogens10091102), 2021-08-29
Supplement: s1 [file s1]

**Table S1.** Signalment, vaccination data and results for canine parvovirus type 2 (CPV-2) testing of fecal samples (n=63) collected from dogs (n=50) and cats (n=13) via three different veterinary clinics in Sri Lanka between December 2015 to April 2017.

| ID | Breed      | Sex | Age (months) | Vaccination | Time since last vaccination (months) | Province | CPV-2 (pos/neg)  | CPV-2 sub-type |
|----|------------|-----|--------------|-------------|--------------------------------------|----------|------------------|----------------|
| 1  | Xbred      | F   | 1            | UNK         | UNK                                  | Central  | neg              |                |
| 2  | Xbred      | M   | 7            | UNK         | UNK                                  | Central  | pos              | CPV-2a         |
| 3  | Xbred      | M   | 6            | UNK         | UNK                                  | Central  | pos              | CPV-2b         |
| 4  | Xbred      | M   | 204          | UNK         | UNK                                  | Central  | pos              | CPV-2b         |
| 5  | Xbred      | M   | 12           | yes         | 13                                   | Central  | pos              | CPV-2a         |
| 6  | Xbred      | M   | 3            | UNK         | UNK                                  | Central  | pos              | CPV-2a         |
| 7  | Pomeranian | M   | 10           | yes         | 7                                    | Central  | neg              |                |
| 8  | Xbred      | M   | 60           | yes         | 45                                   | Central  | neg              |                |
| 9  | Rottweiler | M   | 12           | yes         | 10                                   | Central  | pos              | CPV-2b         |
| 10 | GSD        | F   | 42           | yes         | 4                                    | Central  | neg              |                |
| 11 | Labrador   | F   | 38           | yes         | 11                                   | Central  | neg              |                |
| 12 | GSD        | M   | 6            | yes         | 3                                    | Central  | pos              | CPV-2a         |
| 13 | GSD        | M   | 14           | yes         | 12                                   | Central  | neg              |                |
| 14 | GSD        | F   | 3            | yes         | 1                                    | Central  | neg              |                |
| 15 | Xbred      | F   | 2            | yes         | UNK                                  | Central  | pos              | CPV-2a         |
| 16 | Labrador   | M   | 2            | yes         | 1                                    | Central  | pos              | CPV-2b         |
| 17 | GSD        | M   | 18           | yes         | 0.3                                  | Central  | pos              | CPV-2b         |
| 18 | GSD        | M   | 12           | yes         | UNK                                  | Central  | pos              | CPV-2b         |
| 19 | Xbred      | M   | 4            | UNK         | UNK                                  | Central  | pos              | CPV-2a         |
| 20 | Boxer      | F   | 2            | UNK         | UNK                                  | Central  | pos              | CPV-2c         |
| 21 | Dachshund  | F   | 96           | yes         | > 12                                 | Central  | neg              |                |
| 22 | Xbred      | F   | 24           | yes         | 1                                    | Central  | neg              |                |
| 25 | Xbred      | M   | 5            | UNK         | UNK                                  | Western  | pos              | CPV-2c         |
| 26 | Xbred      | M   | 5            | UNK         | UNK                                  | Western  | pos              | CPV-2c         |
| 27 | Xbred      | M   | 48           | yes         | 46                                   | Western  | neg <sup>1</sup> |                |
| 28 | Xbred      | M   | 8            | UNK         | UNK                                  | Western  | pos              | CPV-2c         |
| 29 | Xbred      | M   | 4            | UNK         | UNK                                  | Western  | pos              | CPV-2c         |
| 30 | Xbred      | -   | UNK          | UNK         | UNK                                  | Western  | pos              | CPV-2c         |
| 31 | Xbred      | UNK | UNK          | UNK         | UNK                                  | Western  | pos              | CPV-2c         |
| 32 | GSD        | M   | 6            | UNK         | UNK                                  | Southern | neg              |                |
| 33 | GSD        | M   | 14           | UNK         | UNK                                  | Southern | neg              |                |
| 34 | Xbred      | UNK | 108          | UNK         | UNK                                  | Southern | pos              | CPV-2a         |
| 35 | Xbred      | UNK | UNK          | UNK         | UNK                                  | Southern | neg              |                |
| 36 | Xbred      | UNK | UNK          | UNK         | UNK                                  | Southern | neg              |                |
| 37 | Xbred      | UNK | UNK          | UNK         | UNK                                  | Southern | neg              |                |
| 38 | GSD        | UNK | 5            | UNK         | UNK                                  | Southern | pos              | CPV-2a         |
| 39 | Xbred      | UNK | 5            | UNK         | UNK                                  | Southern | pos              | CPV-2a         |
| 40 | Xbred      | UNK | 7            | UNK         | UNK                                  | Southern | pos              | CPV-2a         |
| 41 | Xbred      | UNK | UNK          | UNK         | UNK                                  | Southern | pos              | CPV-2a         |
| 42 | Xbred      | UNK | UNK          | UNK         | UNK                                  | Southern | pos              | CPV-2a CPV-2c  |
| 43 | Xbred      | UNK | UNK          | UNK         | UNK                                  | Southern | pos              | CPV-2c         |
| 44 | Xbred      | UNK | UNK          | UNK         | UNK                                  | Southern | neg              |                |
| 54 | Rottweiler | UNK | 1            | UNK         | UNK                                  | Central  | pos              | CPV-2a         |
| 55 | Rottweiler | F   | 17           | UNK         | UNK                                  | Central  | pos              | CPV-2a         |
| 56 | Dobermann  | UNK | UNK          | UNK         | UNK                                  | Central  | pos              | CPV-2a CPV-2c  |
| 58 | Xbred      | UNK | UNK          | UNK         | UNK                                  | Central  | pos              | CPV-2c         |
| 61 | Xbred      | F   | 5            | UNK         | UNK                                  | Central  | pos              | CPV-2a         |

|      |         |     |     |     |     |         |                  |        |
|------|---------|-----|-----|-----|-----|---------|------------------|--------|
| 63   | Xbred   | UNK | UNK | UNK | UNK | Central | neg              |        |
| 64   | Xbred   | UNK | UNK | UNK | UNK | Central | neg <sup>1</sup> |        |
| 65   | Xbred   | UNK | UNK | UNK | UNK | Central | neg              |        |
| Cats |         |     |     |     |     |         |                  |        |
| 45   | Xbred   | M   | 24  | UNK | UNK | Central | pos              | CPV-2a |
| 46   | Xbred   | UNK | 18  | UNK | UNK | Central | pos              | CPV-2b |
| 47   | Xbred   | F   | 28  | UNK | UNK | Central | pos              | CPV-2  |
| 48   | Xbred   | F   | 36  | UNK | UNK | Central | pos              | CPV-2b |
| 49   | Xbred   | UNK | 4   | UNK | UNK | Central | pos              | CPV-2a |
| 50   | Xbred   | UNK | 5   | UNK | UNK | Central | pos              | CPV-2a |
| 51   | Xbred   | F   | 5   | UNK | UNK | Central | neg              |        |
| 52   | Xbred   | M   | UNK | UNK | UNK | Central | pos              | CPV-2a |
| 53   | Xbred   | UNK | 60  | UNK | UNK | Central | neg              |        |
| 57   | Xbred   | UNK | UNK | UNK | UNK | Central | pos              | CPV-2a |
| 59   | Xbred   | F   | 84  | UNK | UNK | Central | neg              |        |
| 60   | Persian | UNK | 12  | UNK | UNK | Central | pos              | CPV-2a |
| 62   | Xbred   | F   | 3   | UNK | UNK | Central | neg              |        |

<sup>1</sup> No amplifiable DNA present: sample excluded from the study. Abbreviations: unknown (UNK); male (M); female (F); crossbred (Xbred); positive (pos); negative (neg).

**Table S2.** Canine parvovirus type 2 sequences included in the international network.

| No | Country of Origin | Isolate/strain | Accession Number | Subtype | Year | Haplotype |
|----|-------------------|----------------|------------------|---------|------|-----------|
| 1  | Argentina         | Arg9           | JF346754         | CPV-2a  | 2003 | Hap_130   |
| 2  | Argentina         | Arg5           | JF414817         | CPV-2b  | 2003 | Hap_131   |
| 3  | Argentina         | Arg32          | JF414818         | CPV-2c  | 2008 | Hap_132   |
| 4  | Argentina         | Arg35          | JF414819         | CPV-2c  | 2008 | Hap_18    |
| 5  | Argentina         | Arg44          | JF414820         | CPV-2c  | 2003 | Hap_133   |
| 6  | Argentina         | Arg48          | JF414821         | CPV-2c  | 2009 | Hap_134   |
| 7  | Argentina         | Arg64          | JF414822         | CPV-2c  | 2010 | Hap_134   |
| 8  | Argentina         | Arg60          | JF414823         | CPV-2c  | 2009 | Hap_134   |
| 9  | Argentina         | Arg66          | JF414824         | CPV-2c  | 2010 | Hap_135   |
| 10 | Argentina         | Arg67          | JF414825         | CPV-2c  | 2010 | Hap_135   |
| 11 | Argentina         | Arg68          | JF414826         | CPV-2c  | 2010 | Hap_136   |
| 12 | Australia         | FPV-193        | X55115           | FPV     | 1970 | Hap_190   |
| 13 | Brazil            | BR6-80         | DQ340404         | CPV-2a  | 1980 | Hap_40    |
| 14 | Brazil            | BR137-80       | DQ340406         | CPV-2a  | 1980 | Hap_40    |
| 15 | Brazil            | BR183-85       | DQ340409         | CPV-2a  | 1985 | Hap_41    |
| 16 | Brazil            | BR315-86       | DQ340410         | CPV-2a  | 1986 | Hap_42    |
| 17 | Brazil            | BR8-90         | DQ340411         | CPV-2a  | 1990 | Hap_43    |
| 18 | Brazil            | BR17-90        | DQ340412         | CPV-2a  | 1990 | Hap_44    |
| 19 | Brazil            | BR22-93        | DQ340422         | CPV-2a  | 1993 | Hap_45    |
| 20 | Brazil            | BR46-95        | DQ340430         | CPV-2a  | 1995 | Hap_46    |
| 21 | Brazil            | BR56-95        | DQ340431         | CPV-2a  | 1995 | Hap_47    |
| 22 | Brazil            | BR7168-00      | DQ340433         | CPV-2a  | 2000 | Hap_48    |
| 23 | Brazil            | BR8155-00      | DQ340434         | CPV-2a  | 2000 | Hap_49    |
| 24 | Brazil            | Bel2014-01     | KX774249         | CPV-2b  | 2014 | Hap_159   |
| 25 | Brazil            | Bel2016-01     | KX774250         | CPV-2b  | 2016 | Hap_159   |
| 26 | Brazil            | Bel2015-01     | KX774251         | CPV-2b  | 2015 | Hap_160   |
| 27 | China             | HN-3           | DQ177497         | CPV-2b  | 2005 | Hap_39    |
| 28 | China             | RPPV           | DQ354068         | CPV-2a  | UNK  | Hap_50    |
| 29 | China             | B-2004         | EF011664         | CPV-2a  | UNK  | Hap_51    |
| 30 | China             | CPV/BJ004/07   | EF666059         | CPV-2a  | UNK  | Hap_55    |
| 31 | China             | CPV/BJ008/07   | EF666061         | CPV-2a  | UNK  | Hap_56    |
| 32 | China             | CPV/BJ17/06    | EF666065         | CPV-2a  | UNK  | Hap_57    |
| 33 | China             | CPV/BJ020/07   | EF666067         | CPV-2a  | UNK  | Hap_50    |
| 34 | China             | CPV/BJ050/07   | EU145955         | CPV-2a  | UNK  | Hap_63    |
| 35 | China             | CPV-SHZ        | EU170352         | CPV-2a  | UNK  | Hap_64    |
| 36 | China             | CPV-HZ0761     | EU213073         | CPV-2a  | UNK  | Hap_65    |
| 37 | China             | CPV-APD1       | EU213074         | CPV-2a  | UNK  | Hap_50    |
| 38 | China             | CPV-BD1 (2b)   | EU213075         | CPV-2b  | UNK  | Hap_66    |
| 39 | China             | CPV-JB1 (2a)   | EU213076         | CPV-2a  | UNK  | Hap_67    |
| 40 | China             | CPV-HT (2a)    | EU213077         | CPV-2a  | UNK  | Hap_68    |
| 41 | China             | CPV-BD3 (2a)   | EU213080         | CPV-2a  | UNK  | Hap_50    |
| 42 | China             | CPV-BD4 (2a)   | EU213081         | CPV-2a  | UNK  | Hap_69    |
| 43 | China             | CPV-KT1 (2a)   | EU213082         | CPV-2a  | UNK  | Hap_70    |
| 44 | China             | CPV-KT2 (2a)   | EU213083         | CPV-2a  | UNK  | Hap_70    |
| 45 | China             | CPV-ZD2 (2a)   | EU213084         | CPV-2a  | UNK  | Hap_71    |
| 46 | China             | CPV-ZD3 (2a)   | EU213085         | CPV-2a  | UNK  | Hap_72    |
| 47 | China             | cpv/nj01/06    | EU310373         | CPV-2a  | 2006 | Hap_73    |
| 48 | China             | CPV/WH02/06    | EU377537         | CPV-2a  | 2006 | Hap_74    |
| 49 | China             | PV/PL/HeN03/08 | EU441279         | CPV-2a  | 2008 | Hap_75    |
| 50 | China             | PV/PL/HeN02/08 | EU441280         | CPV-2a  | 2008 | Hap_76    |
| 51 | China             | CPV-JB3        | EU483510         | CPV-2b  | UNK  | Hap_77    |
| 52 | China             | CPV-ZD4        | EU483511         | CPV-2a  | UNK  | Hap_78    |
| 53 | China             | CPV-ZD6        | EU483512         | CPV-2b  | UNK  | Hap_10    |
| 54 | China             | CPV-ZD35       | EU483517         | CPV-2b  | UNK  | Hap_79    |
| 55 | China             | HLJ-JQ         | EU697385         | CPV-2a  | 2007 | Hap_84    |
| 56 | China             | 02/09          | GU380299         | CPV-2b  | 2009 | Hap_112   |

|     |         |                        |          |        |      |         |
|-----|---------|------------------------|----------|--------|------|---------|
| 57  | China   | 04/09                  | GU380301 | CPV-2a | 2009 | Hap_73  |
| 58  | China   | 08/09                  | GU380305 | CPV-2c | 2009 | Hap_113 |
| 59  | China   | 09/09                  | GU452713 | CPV-2a | 2009 | Hap_50  |
| 60  | China   | 11/09                  | GU452715 | CPV-2a | 2009 | Hap_114 |
| 61  | China   | JL0201                 | GU569946 | CPV-2a | 2001 | Hap_115 |
| 62  | China   | CC8601                 | GU569948 | CPV-2a | 1986 | Hap_50  |
| 63  | China   | YAZA1                  | HQ651237 | CPV-2a | 2009 | Hap_128 |
| 64  | China   | BJ/2010                | HQ883273 | CPV-2a | 2010 | Hap_129 |
| 65  | China   | S2                     | JF767492 | CPV-2a | 2009 | Hap_50  |
| 66  | China   | S5                     | JF767493 | CPV-2a | 2009 | Hap_50  |
| 67  | China   | S7                     | JF767494 | CPV-2a | 2009 | Hap_137 |
| 68  | China   | G12                    | JF795456 | CPV-2a | 2010 | Hap_57  |
| 69  | China   | Shanaxi                | JN403045 | CPV-2a | 2011 | Hap_138 |
| 70  | China   | CPV-LZ2                | JQ268284 | CPV-2b | 2011 | Hap_145 |
| 71  | China   | CPV-YH                 | KY403998 | CPV-2a | 2008 | Hap_25  |
| 72  | China   | CPV-BJ03/17            | MF134808 | CPV-2a | 2017 | Hap_170 |
| 73  | China   | Canine/China/08/2016   | MF805796 | CPV-2c | 2016 | Hap_171 |
| 74  | China   | CPV-BJL1               | MH106698 | CPV-2a | 2015 | Hap_25  |
| 75  | China   | CPV-BJL2               | MH106699 | CPV-2b | 2015 | Hap_145 |
| 76  | China   | CPV-BJL3               | MH106700 | CPV-2c | 2016 | Hap_172 |
| 77  | China   | Canine/China/13/2017   | MH476580 | CPV-2a | 2017 | Hap_173 |
| 78  | China   | Canine/China/12/2017   | MH476581 | CPV-2c | 2017 | Hap_30  |
| 79  | China   | Canine/China/11/2017   | MH476582 | CPV-2a | 2017 | Hap_174 |
| 80  | China   | Canine/China/15/2017   | MH476584 | CPV-2c | 2017 | Hap_175 |
| 81  | China   | Canine/China/16/2017   | MH476585 | CPV-2c | 2017 | Hap_171 |
| 82  | China   | Canine/China/17/2017   | MH476586 | CPV-2a | 2017 | Hap_25  |
| 83  | China   | Canine/China/19/2017   | MH476588 | CPV-2b | 2017 | Hap_145 |
| 84  | China   | Canine/China/20/2017   | MH476589 | CPV-2a | 2017 | Hap_176 |
| 85  | China   | Canine/China/21/2017   | MH476590 | CPV-2a | 2017 | Hap_25  |
| 86  | China   | Canine/China/23/2017   | MH476592 | CPV-2c | 2017 | Hap_177 |
| 87  | China   | Canine/China/24/2017   | MH476593 | CPV-2a | 2017 | Hap_178 |
| 88  | China   | CPV-AHhf1              | MT010564 | CPV-2c | 2018 | Hap_30  |
| 89  | China   | PV-2c/China/SC-14/2017 | MT165693 | CPV-2c | 2017 | Hap_171 |
| 90  | Germany | CPV-447                | AY742934 | CPV-2b | 1995 | Hap_21  |
| 91  | Germany | CPV-U6                 | AY742935 | CPV-2a | 1995 | Hap_15  |
| 92  | Germany | CPV-U51                | AY742942 | CPV-2c | 1997 | Hap_18  |
| 93  | Germany | G7/97                  | FJ005196 | CPV-2c | 1997 | Hap_85  |
| 94  | Germany | FPV-377                | U22188   | FPV    | 1993 | Hap_188 |
| 95  | Greece  | GR51/08                | GQ865518 | CPV-2c | 2008 | Hap_18  |
| 96  | Greece  | GR09/09                | GQ865519 | CPV-2c | 2009 | Hap_18  |
| 97  | India   | CPV2a                  | AJ564427 | CPV-2a | UNK  | Hap_19  |
| 98  | India   | TN/CPV2a/2018          | MH545963 | CPV-2a | 2018 | Hap_25  |
| 99  | India   | India CPV-2a           | MN661243 | CPV-2a | 2016 | Hap_186 |
| 100 | Italy   | CPV-W42                | AF306444 | CPV-2b | 1995 | Hap_13  |
| 101 | Italy   | CPV-632                | AF306445 | CPV-2a | 1996 | Hap_14  |
| 102 | Italy   | CPV-584                | AF306446 | CPV-2a | 1994 | Hap_15  |
| 103 | Italy   | CPV-618                | AF306447 | CPV-2a | 1995 | Hap_15  |
| 104 | Italy   | CPV-616                | AF306449 | CPV-2b | 1995 | Hap_13  |
| 105 | Italy   | CPV-637                | AF306450 | CPV-2b | 1996 | Hap_16  |
| 106 | Italy   | CPV-699                | AF393506 | CPV-2a | 2000 | Hap_17  |
| 107 | Italy   | CPV-695                | AF401519 | CPV-2c | UNK  | Hap_18  |
| 108 | Italy   | 219/08-5               | FJ005249 | CPV-2c | 2008 | Hap_86  |
| 109 | Italy   | 219/08-13              | FJ005250 | CPV-2c | 2008 | Hap_87  |
| 110 | Italy   | 239/08                 | FJ005251 | CPV-2c | 2008 | Hap_88  |
| 111 | Italy   | 331/05                 | FJ005254 | CPV-2a | 2005 | Hap_89  |
| 112 | Italy   | ,17/08                 | FJ005256 | CPV-2a | 2008 | Hap_15  |
| 113 | Italy   | 54/08                  | FJ005257 | CPV-2a | 2008 | Hap_90  |
| 114 | Italy   | 80/08                  | FJ005258 | CPV-2a | 2008 | Hap_89  |

|     |               |                  |          |        |      |         |
|-----|---------------|------------------|----------|--------|------|---------|
| 115 | Italy         | 100/08           | FJ005259 | CPV-2a | 2008 | Hap_15  |
| 116 | Italy         | 134/05           | FJ005264 | CPV-2b | 2005 | Hap_91  |
| 117 | Italy         | 12/08-A          | GU362933 | CPV-2a | 2008 | Hap_111 |
| 118 | Italy         | 12/08-B          | GU362934 | CPV-2a | 2008 | Hap_111 |
| 119 | Italy         | CPV-2c/707/2001  | KF373575 | CPV-2c | 2001 | Hap_18  |
| 120 | Japan         | CPV97-008        | AB115504 | CPV-2b | 1997 | Hap_8   |
| 121 | Japan         | Sho-nan          | AB128923 | CPV-2b | 2003 | Hap_12  |
| 122 | Japan         | Y1               | D26079   | CPV-2a | 1982 | Hap_37  |
| 123 | Japan         | FPV-314          | D78585   | CPV-2a | 1993 | Hap_38  |
| 124 | Mongolia      | 5 MGL            | MH660909 | CPV-2c | 2017 | Hap_179 |
| 125 | Nigeria       | NIG001           | HQ602990 | CPV-2a | 2010 | Hap_123 |
| 126 | Nigeria       | NIG006           | HQ602991 | CPV-2a | 2010 | Hap_124 |
| 127 | Nigeria       | NIG002           | HQ602992 | CPV-2a | 2010 | Hap_125 |
| 128 | Nigeria       | NIG003           | HQ602993 | CPV-2a | 2010 | Hap_124 |
| 129 | Nigeria       | NIG004           | HQ602994 | CPV-2a | 2010 | Hap_126 |
| 130 | Nigeria       | 15-10NGR2010     | HQ602995 | CPV-2a | 2010 | Hap_127 |
| 131 | Nobivac®DHPPI | CPVint (vaccine) | FJ197846 | CPV-2  | N/A  | Hap_109 |
| 132 | NZ            | CPV-339          | AY742933 | CPV-2a | 1993 | Hap_20  |
| 133 | NZ            | CPV026           | KP881620 | CPV-2a | 2010 | Hap_148 |
| 134 | NZ            | CPV082           | KP881621 | CPV-2a | 2010 | Hap_149 |
| 135 | NZ            | CPV040           | KP881626 | CPV-2a | 2010 | Hap_150 |
| 136 | NZ            | CPV081           | KP881631 | CPV-2a | 2010 | Hap_151 |
| 137 | NZ            | CPV084           | KP881633 | CPV-2a | 2010 | Hap_149 |
| 138 | NZ            | CPV031           | KP881638 | CPV-2a | 2010 | Hap_149 |
| 139 | NZ            | CPV036           | KP881639 | CPV-2a | 2010 | Hap_152 |
| 140 | NZ            | CPV068           | KP881641 | CPV-2a | 2010 | Hap_149 |
| 141 | NZ            | MAF3             | KP881645 | CPV-2  | 1986 | Hap_80  |
| 142 | NZ            | CPV030           | KP881646 | CPV-2a | 2010 | Hap_149 |
| 143 | NZ            | CPV075           | KP881647 | CPV-2a | 2010 | Hap_153 |
| 144 | NZ            | MAF1             | KP881649 | CPV-2a | 2009 | Hap_154 |
| 145 | NZ            | CPV006           | KP881652 | CPV-2a | 2009 | Hap_149 |
| 146 | NZ            | CPV039           | KP881654 | CPV-2a | 2010 | Hap_151 |
| 147 | NZ            | CPV080           | KP881656 | CPV-2a | 2010 | Hap_151 |
| 148 | NZ            | CPV079           | KP881662 | CPV-2a | 2010 | Hap_155 |
| 149 | NZ            | CPV038           | KP881664 | CPV-2a | 2010 | Hap_151 |
| 150 | NZ            | CPV003           | KP881667 | CPV-2a | 2009 | Hap_149 |
| 151 | NZ            | CPV009           | KP881669 | CPV-2a | 2009 | Hap_156 |
| 152 | NZ            | CPV071           | KP881670 | CPV-2a | 2010 | Hap_157 |
| 153 | NZ            | CPV001           | KP881674 | CPV-2a | 2009 | Hap_151 |
| 154 | NZ            | CPV019           | KP881677 | CPV-2a | 2010 | Hap_157 |
| 155 | NZ            | CPV022           | KP881678 | CPV-2a | 2010 | Hap_153 |
| 156 | NZ            | CPV041           | KP881680 | CPV-2a | 2010 | Hap_158 |
| 157 | NZ            | MAF2             | KP881684 | CPV-2a | 1990 | Hap_40  |
| 158 | Poland        | pVP246           | Z46651   | CPV-2b | UNK  | Hap_4   |
| 159 | South Africa  | 22-10SA 2010     | HQ602969 | CPV-2b | 2010 | Hap_4   |
| 160 | South Africa  | 68-10SA 2010     | HQ602970 | CPV-2b | 2010 | Hap_116 |
| 161 | South Africa  | 3-10SA 2010      | HQ602971 | CPV-2a | 2010 | Hap_117 |
| 162 | South Africa  | 32-10SA 2010     | HQ602972 | CPV-2b | 2010 | Hap_118 |
| 163 | South Africa  | 108-10SA 2010    | HQ602973 | CPV-2a | 2010 | Hap_119 |
| 164 | South Africa  | 31-10SA 2010     | HQ602974 | CPV-2a | 2010 | Hap_117 |
| 165 | South Africa  | 101-10SA 2010    | HQ602975 | CPV-2a | 2010 | Hap_50  |
| 166 | South Africa  | 72-10SA 2010     | HQ602976 | CPV-2b | 2010 | Hap_116 |
| 167 | South Africa  | 100-10SA 2010    | HQ602977 | CPV-2a | 2010 | Hap_50  |
| 168 | South Africa  | 63-10SA 2010     | HQ602978 | CPV-2b | 2010 | Hap_120 |
| 169 | South Africa  | 67-10SA 2010     | HQ602979 | CPV-2b | 2010 | Hap_116 |
| 170 | South Africa  | 33-10SA 2010     | HQ602980 | CPV-2b | 2010 | Hap_116 |
| 171 | South Africa  | 78-10SA 2010     | HQ602981 | CPV-2b | 2010 | Hap_116 |
| 172 | South Africa  | 85-10SA 2010     | HQ602982 | CPV-2b | 2010 | Hap_116 |

|     |              |               |          |        |             |         |
|-----|--------------|---------------|----------|--------|-------------|---------|
| 173 | South Africa | 86-10SA 2010  | HQ602983 | CPV-2b | 2010        | Hap_116 |
| 174 | South Africa | 89-10SA 2010  | HQ602984 | CPV-2b | 2010        | Hap_116 |
| 175 | South Africa | 8-10SA 2010   | HQ602985 | CPV-2b | 2010        | Hap_116 |
| 176 | South Africa | 98-10SA 2010  | HQ602986 | CPV-2b | 2010        | Hap_121 |
| 177 | South Africa | 99-10SA 2010  | HQ602987 | CPV-2b | 2010        | Hap_122 |
| 178 | South Africa | CPV-2 2010    | HQ602989 | CPV-2  | 2010        | Hap_110 |
| 179 | South Korea  | CPVKK0501     | EF189717 | CPV-2a | UNK         | Hap_52  |
| 180 | South Korea  | DH326         | EF599097 | CPV-2b | 2005        | Hap_53  |
| 181 | South Korea  | Pome          | EF599098 | CPV-2a | 2005        | Hap_54  |
| 182 | South Korea  | K001          | EU009200 | CPV-2a | 2003 – 2006 | Hap_58  |
| 183 | South Korea  | K014          | EU009201 | CPV-2a | 2003 – 2006 | Hap_59  |
| 184 | South Korea  | K015          | EU009202 | CPV-2a | 2003 – 2006 | Hap_60  |
| 185 | South Korea  | K022          | EU009203 | CPV-2a | 2003 – 2006 | Hap_61  |
| 186 | South Korea  | K026          | EU009204 | CPV-2a | 2003 – 2006 | Hap_50  |
| 187 | South Korea  | K029          | EU009205 | CPV-2b | 2003 – 2006 | Hap_4   |
| 188 | South Korea  | K031          | EU009206 | CPV-2b | 2003 – 2006 | Hap_62  |
| 189 | South Korea  | CPVK1         | FJ197823 | CPV-2a | 2007        | Hap_92  |
| 190 | South Korea  | CPVK2         | FJ197824 | CPV-2a | 2007        | Hap_93  |
| 191 | South Korea  | CPVK3         | FJ197825 | CPV-2a | 2007        | Hap_94  |
| 192 | South Korea  | CPVK4         | FJ197826 | CPV-2a | 2007        | Hap_60  |
| 193 | South Korea  | CPVK5         | FJ197827 | CPV-2a | 2007        | Hap_95  |
| 194 | South Korea  | CPVK6         | FJ197828 | CPV-2a | 2007        | Hap_96  |
| 195 | South Korea  | CPVK7         | FJ197829 | CPV-2a | 2007        | Hap_97  |
| 196 | South Korea  | CPVK8         | FJ197830 | CPV-2a | 2007        | Hap_60  |
| 197 | South Korea  | CPVK9         | FJ197831 | CPV-2a | 2007        | Hap_98  |
| 198 | South Korea  | CPVK10        | FJ197832 | CPV-2a | 2007        | Hap_58  |
| 199 | South Korea  | CPVK11        | FJ197833 | CPV-2a | 2007        | Hap_99  |
| 200 | South Korea  | CPVK12        | FJ197834 | CPV-2a | 2007        | Hap_89  |
| 201 | South Korea  | CPVK13        | FJ197835 | CPV-2a | 2007        | Hap_100 |
| 202 | South Korea  | CPVK14        | FJ197836 | CPV-2a | 2007        | Hap_101 |
| 203 | South Korea  | CPVK15        | FJ197837 | CPV-2a | 2007        | Hap_58  |
| 204 | South Korea  | CPVK16        | FJ197838 | CPV-2a | 2007        | Hap_102 |
| 205 | South Korea  | CPVK17        | FJ197839 | CPV-2a | 2007        | Hap_103 |
| 206 | South Korea  | CPVK18        | FJ197840 | CPV-2a | 2007        | Hap_104 |
| 207 | South Korea  | CPVK19        | FJ197841 | CPV-2a | 2007        | Hap_105 |
| 208 | South Korea  | CPVK20        | FJ197842 | CPV-2a | 2007        | Hap_106 |
| 209 | South Korea  | CPVK21        | FJ197843 | CPV-2a | 2007        | Hap_107 |
| 210 | South Korea  | CPVK22        | FJ197844 | CPV-2a | 2007        | Hap_60  |
| 211 | South Korea  | CPVK23        | FJ197845 | CPV-2a | 2007        | Hap_108 |
| 212 | South Korea  | Korea CPV2c_1 | MK306289 | CPV-2c | 2017        | Hap_180 |
| 213 | South Korea  | Korea CPV2c_2 | MK306290 | CPV-2c | 2017        | Hap_181 |
| 214 | South Korea  | Gigucheon     | MN400978 | FPV    | 2017        | Hap_182 |
| 215 | South Korea  | Jun           | MN400979 | FPV    | 2017        | Hap_183 |
| 216 | South Korea  | Rara          | MN400980 | FPV    | 2017        | Hap_184 |
| 217 | South Korea  | Rachi         | MN400981 | CPV-2b | 2017        | Hap_185 |
| 218 | Sri Lanka    | CPV.S02       | CPV/S02  | CPV-2a | 2015-17     | Hap_25  |
| 219 | Sri Lanka    | CPV.S03       | CPV/S03  | CPV-2b | 2015-17     | Hap_26  |
| 220 | Sri Lanka    | CPV.S05       | CPV/S05  | CPV-2a | 2015-17     | Hap_25  |
| 221 | Sri Lanka    | CPV.S15       | CPV/S15  | CPV-2a | 2015-17     | Hap_27  |
| 222 | Sri Lanka    | CPV.S16       | CPV/S16  | CPV-2b | 2015-17     | Hap_26  |
| 223 | Sri Lanka    | CPV.S18       | CPV/S18  | CPV-2b | 2015-17     | Hap_28  |
| 224 | Sri Lanka    | CPV.S19       | CPV/S19  | CPV-2a | 2015-17     | Hap_25  |
| 225 | Sri Lanka    | CPV.S25       | CPV/S25  | CPV-2c | 2015-17     | Hap_29  |
| 226 | Sri Lanka    | CPV.S26       | CPV/S26  | CPV-2c | 2015-17     | Hap_29  |
| 227 | Sri Lanka    | CPV.S28       | CPV/S28  | CPV-2c | 2015-17     | Hap_30  |
| 228 | Sri Lanka    | CPV.S29       | CPV/S29  | CPV-2c | 2015-17     | Hap_30  |
| 229 | Sri Lanka    | CPV.S31       | CPV/S31  | CPV-2c | 2015-17     | Hap_30  |
| 230 | Sri Lanka    | CPV.S34       | CPV/S34  | CPV-2a | 2015-17     | Hap_31  |

|     |                |                         |          |        |         |         |
|-----|----------------|-------------------------|----------|--------|---------|---------|
| 231 | Sri Lanka      | CPV.S39                 | CPV/S39  | CPV-2a | 2015-17 | Hap_31  |
| 232 | Sri Lanka      | CPV.S40                 | CPV/S40  | CPV-2a | 2015-17 | Hap_31  |
| 233 | Sri Lanka      | CPV.S41                 | CPV/S41  | CPV-2a | 2015-17 | Hap_31  |
| 234 | Sri Lanka      | CPV.S42                 | CPV/S42  | CPV-2a | 2015-17 | Hap_32  |
| 235 | Sri Lanka      | CPV.S43                 | CPV/S43  | CPV-2c | 2015-17 | Hap_30  |
| 236 | Sri Lanka      | CPV.S45                 | CPV/S45  | CPV-2a | 2015-17 | Hap_25  |
| 237 | Sri Lanka      | CPV.S46                 | CPV/S46  | CPV-2b | 2015-17 | Hap_33  |
| 238 | Sri Lanka      | CPV.S47                 | CPV/S47  | CPV-2  | 2015-17 | Hap_34  |
| 239 | Sri Lanka      | CPV.S48                 | CPV/S48  | CPV-2b | 2015-17 | Hap_33  |
| 240 | Sri Lanka      | CPV.S49                 | CPV/S49  | CPV-2a | 2015-17 | Hap_25  |
| 241 | Sri Lanka      | CPV.S50                 | CPV/S50  | CPV-2a | 2015-17 | Hap_25  |
| 242 | Sri Lanka      | CPV.S52                 | CPV/S52  | CPV-2a | 2015-17 | Hap_35  |
| 243 | Sri Lanka      | CPV.S54                 | CPV/S54  | CPV-2a | 2015-17 | Hap_25  |
| 244 | Sri Lanka      | CPV.S55                 | CPV/S55  | CPV-2a | 2015-17 | Hap_36  |
| 245 | Sri Lanka      | CPV.S56                 | CPV/S56  | CPV-2c | 2015-17 | Hap_30  |
| 246 | Sri Lanka      | CPV.S57                 | CPV/S57  | CPV-2a | 2015-17 | Hap_36  |
| 247 | Sri Lanka      | CPV.S58                 | CPV/S58  | CPV-2c | 2015-17 | Hap_30  |
| 248 | Sri Lanka      | CPV.S61                 | CPV/S61  | CPV-2a | 2015-17 | Hap_36  |
| 249 | Taiwan         | Taiwan9                 | AB054213 | CPV-2a | 1998    | Hap_1   |
| 250 | Taiwan         | Taichung                | AY869724 | CPV-2b | 2004    | Hap_24  |
| 251 | Taiwan         | T10 (2b)                | U72696   | CPV-2b | 1995    | Hap_8   |
| 252 | Thailand       | CPV/VT114               | KP715709 | CPV-2b | UNK     | Hap_147 |
| 253 | UK             | FPV-a                   | M24002   | FPV    | 1962    | Hap_166 |
| 254 | Uruguay        | Uy-243/10               | JF906788 | CPV-2a | 2010    | Hap_25  |
| 255 | Uruguay        | M21                     | KC196099 | CPV-2c | 2006    | Hap_146 |
| 256 | USA            | CPV-193                 | AY742932 | CPV-2b | 1991    | Hap_4   |
| 257 | USA            | CPV-431                 | AY742951 | CPV-2b | 2003    | Hap_22  |
| 258 | USA            | CPV-435                 | AY742953 | CPV-2a | 2003    | Hap_23  |
| 259 | USA            | CPV-5.us.79             | EU659116 | CPV-2  | 1979    | Hap_80  |
| 260 | USA            | CPV-6.us.80             | EU659117 | CPV-2  | 1980    | Hap_80  |
| 261 | USA            | CPV-13.us.81            | EU659118 | CPV-2b | 1981    | Hap_81  |
| 262 | USA            | CPV-410.us.00           | EU659119 | CPV-2b | 2000    | Hap_82  |
| 263 | USA            | CPV-411a.us.98          | EU659120 | CPV-2b | 1998    | Hap_82  |
| 264 | USA            | USA010                  | EU659121 | CPV-2b | 1998    | Hap_83  |
| 265 | USA            | CPV-2b/Dog/CA/148743/08 | JN867602 | CPV-2b | 2008    | Hap_139 |
| 266 | USA            | CPV-2b/Dog/KS/81213/09  | JN867603 | CPV-2b | 2009    | Hap_140 |
| 267 | USA            | CPV-2b/Dog/US/142805/09 | JN867605 | CPV-2b | 2009    | Hap_142 |
| 268 | USA            | CPV-2b/Dog/US/19923/09  | JN867606 | CPV-2b | 2009    | Hap_53  |
| 269 | USA            | CPV-2b/Dog/NY/LP62/08   | JN867607 | CPV-2b | 2008    | Hap_143 |
| 270 | USA            | CPV-2b/Dog/IL/24124/09  | JN867608 | CPV-2b | 2009    | Hap_141 |
| 271 | USA            | CPV-2b/Dog/KY/93238/08  | JN867609 | CPV-2b | 2008    | Hap_144 |
| 272 | USA            | FPV-Carlson             | M10824   | FPV    | 1966    | Hap_163 |
| 273 | USA            | CPV_Norden              | M19296   | CPV-2  | 1978    | Hap_164 |
| 274 | USA            | CPV-31                  | M24000   | CPV-2a | 1983    | Hap_165 |
| 275 | USA            | CPV-15                  | M24003   | CPV-2a | 1984    | Hap_167 |
| 276 | USA            | CPV-b                   | M38245   | CPV-2  | 1978    | Hap_80  |
| 277 | USA            | FPV-b                   | M38246   | FPV    | 1967    | Hap_168 |
| 278 | USA            | CPV-39                  | M74849   | CPV-2b | 1984    | Hap_169 |
| 279 | USA            | CPV-133                 | M74852   | CPV-2b | 1990    | Hap_4   |
| 280 | USA            | CPV39                   | MN451663 | CPV-2b | 1984    | Hap_4   |
| 281 | USA            | CPV-128                 | U22186   | CPV-2  | 1979    | Hap_80  |
| 282 | USA            | FPV-23                  | U22187   | FPV    | 1990    | Hap_187 |
| 283 | USA            | FPV-d                   | U22189   | FPV    | 1964    | Hap_189 |
| 284 | USA            | CPV-2b/Dog/IL/137654/08 | JN867604 | CPV-2b | 2008    | Hap_141 |
| 285 | Vanguard@plus5 | CPVpf (vaccine)         | FJ197847 | CPV-2  | N/A     | Hap_110 |
| 286 | Vietnam        | V120                    | AB054215 | CPV-2a | 1997    | Hap_2   |
| 287 | Vietnam        | V154                    | AB054217 | CPV-2a | 1997    | Hap_3   |
| 288 | Vietnam        | V209                    | AB054219 | CPV-2b | 1997    | Hap_4   |

|     |         |                     |          |        |      |         |
|-----|---------|---------------------|----------|--------|------|---------|
| 289 | Vietnam | V217                | AB054220 | CPV-2b | 1997 | Hap_4   |
| 290 | Vietnam | LCPVV204            | AB054221 | CPV-2b | 1997 | Hap_5   |
| 291 | Vietnam | LCPVV139            | AB054222 | CPV-2a | 1997 | Hap_6   |
| 292 | Vietnam | LCPVV203            | AB054224 | CPV-2b | 1997 | Hap_7   |
| 293 | Vietnam | HCM-8               | AB120721 | CPV-2b | 2003 | Hap_9   |
| 294 | Vietnam | HNI-2-13            | AB120724 | CPV-2b | 2003 | Hap_10  |
| 295 | Vietnam | HNI-4-1             | AB120727 | CPV-2c | 2003 | Hap_11  |
| 296 | Vietnam | CPV/dog/HCM/14/2013 | LC216909 | CPV-2c | 2013 | Hap_161 |
| 297 | Vietnam | CPV/dog/HCM/20/2013 | LC216910 | CPV-2c | 2013 | Hap_162 |
